# Supplementary material for: Changing sub-Arctic tundra vegetation upon permafrost degradation: impact on foliar mineral element cycling
Source: Copernicus journal article supplement (doi:10.5194/bg-2021-263), 2021-10-20
Supplement: Supplementary file 1 [file bg-2021-263-supplement.pdf]

## *Supplement*

# **Changing sub-Arctic tundra vegetation upon permafrost degradation: impact on foliar mineral element cycling**

Elisabeth Mauclet<sup>1\*</sup>, Yannick Agnan<sup>1</sup>, Catherine Hirst<sup>1</sup>, Arthur Monhonval<sup>1</sup>, Benoît Pereira<sup>1</sup>, Aubry  
5 Vandeuren<sup>1</sup>, Maëlle Villani<sup>1</sup>, Justin Ledman<sup>2</sup>, Meghan Taylor<sup>2</sup>, Briana L. Jasinski<sup>2</sup>, Edward A. G.  
Schoor<sup>2</sup>, Sophie Opfergelt<sup>1</sup>

<sup>1</sup>Earth and Life Institute, Université catholique de Louvain, Louvain-la-Neuve, Belgium

<sup>2</sup>Center for Ecosystem Science and Society, Northern Arizona University, Flagstaff, AZ, USA

*Correspondence to:* Elisabeth Mauclet (elisabeth.mauclet@uclouvain.be)

### 10 **Text S.1. Method to correct pXRF measurements using linear regressions between pXRF and ICP OES total element measurements he logo of Copernicus Publications.**

For trueness of the total element concentrations measured by pXRF on the total set of foliar samples (n=506), we calibrated  
the pXRF measurements with another accurate analytical method. For 90 foliar and litter samples, we compared the total  
elemental concentrations (Al, Ca, Fe, K, Mn, P, S, Si, and Zn) measured by pXRF with the concentrations of the same elements  
15 measured by ICP-OES (iCAP 6500 ThermoFisher Scientific, Waltham, USA) after sample dissolution by alkaline fusion. For  
the fusion, a portion of the ground sample was mixed with lithium metaborate and lithium tetraborate and heated up to 1000°C.  
The fusion bead was dissolved in HNO<sub>3</sub> 2.2 N at 80°C and stirred until complete dissolution (Chao and Sanzalone, 1992).  
The loss on ignition was assessed at 500°C and total element content was expressed in reference to the dry weight at 60°C.  
Trueness of the analytical measurement by ICP-OES was validated by repeated measurements on the lichen reference material  
20 IAEA-336 Lichen (Heller-Zeisler et al., 1999). For the selected mineral elements (Al, Ca, Fe, K, Mn, P, S, Si, and Zn), the  
linear regressions based on the two analytical methods (pXRF and ICP-OES) presented coefficients of correlation (R<sup>2</sup>) between  
the two methods higher than 0.7, except for Fe at 0.6 and S at 0.5 (Figure S1).

**Figure S.1. Linear regressions between XRF and ICP OES measurements of mineral element concentration (Al, Ca, Fe, K, Mn, P, S, Si, Zn) from organic matrices (foliar tissues and soil litter).**

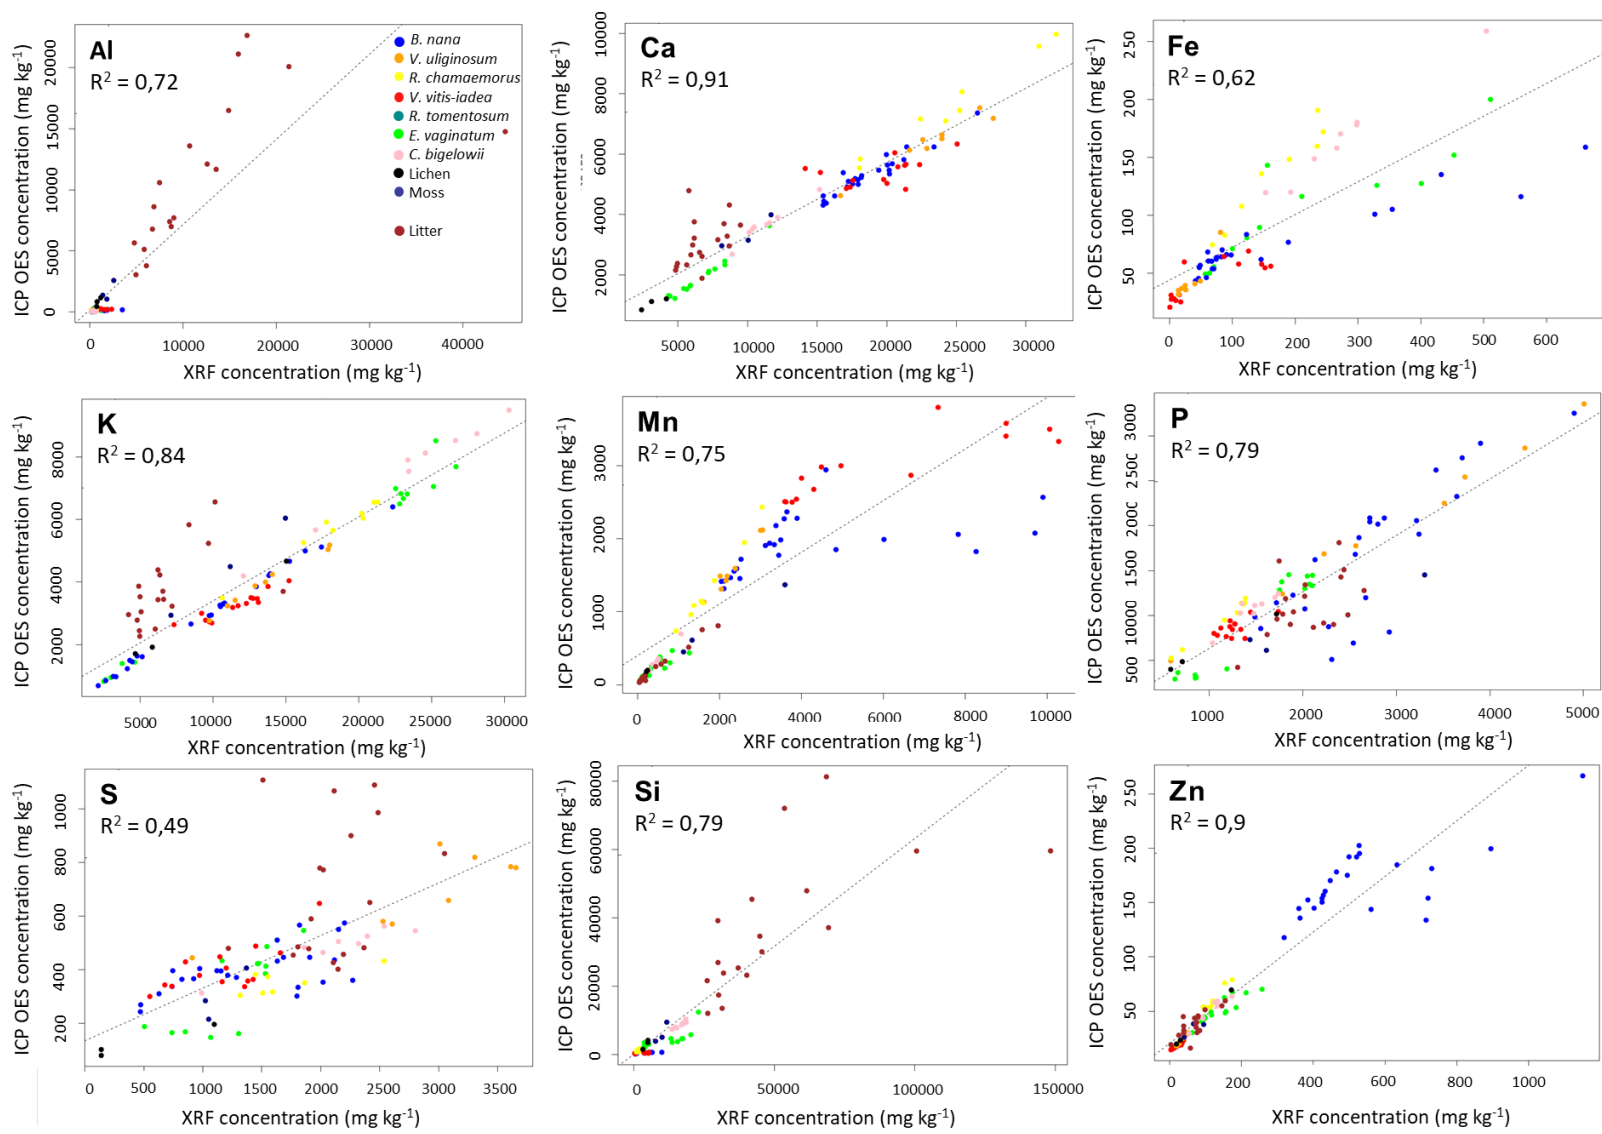

30

**Figure S.2. Cumulative foliar stocks (mg m<sup>-2</sup>) of mineral elements (K, Al, P, S, Fe, and Zn) into typical moist acidic tundra species. At the Carbon in Permafrost Experimental Heating Research (CiPEHR), elemental content of mosses and lichens was not measure. The four treatments (Control, Summer warming, Winter warming and Annual warming) refer respectively to no artificial treatment, air warming, soil warming and both (air and soil) warming. Vegetation species are sorted by plant functional types; deciduous shrubs and forbs (green), evergreen shrubs (blue), and sedges (yellow). Letters correspond to a mixed model analysis and compare the total foliar elemental stocks between warming treatments and years. Error bars represent standard deviations.**

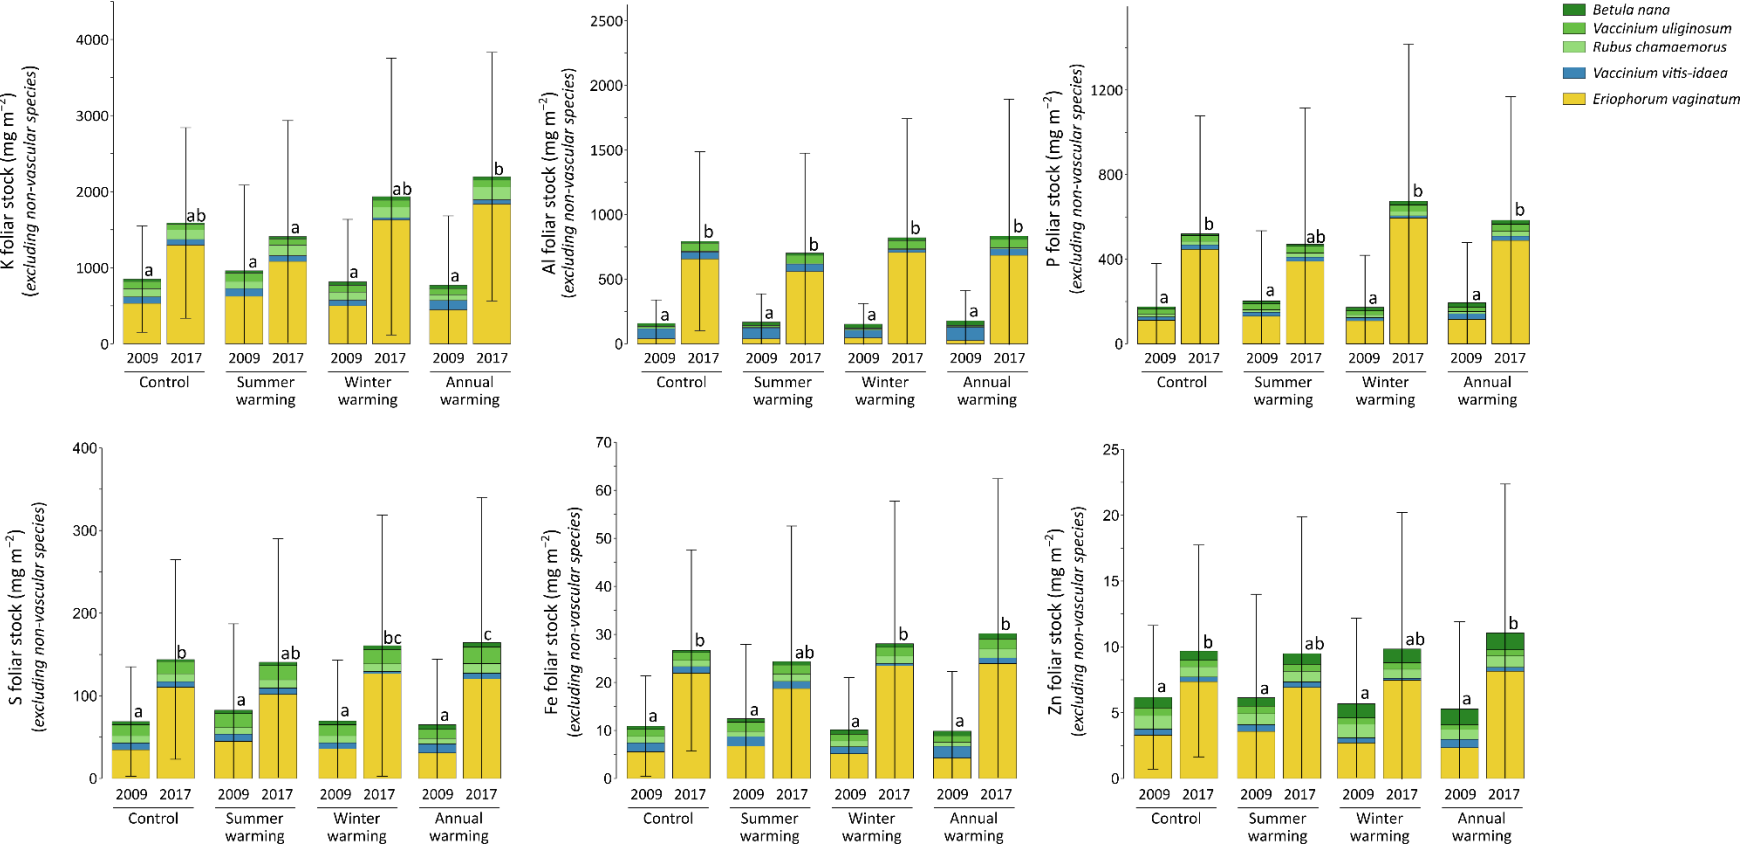

35

40

**Figure S.3.** Cumulative foliar stocks (mg m<sup>-2</sup>) of mineral elements (K, Al, P, S, Fe, and Zn) into typical moist acidic tundra species. The natural thermokarst gradient (Gradient site) displays three stages of permafrost degradation, classified as Minimal, Moderate and Extensive, based on permafrost thaw and subsidence rate. Vegetation species are sorted by plant functional types: deciduous shrubs and forbs (green), evergreen shrubs (blue), sedges (yellow), lichens and mosses (red). Letters correspond to a one-way ANOVA test and compare the total foliar elemental stocks between the three stages of permafrost degradation at Gradient. Error bars represent standard deviations.

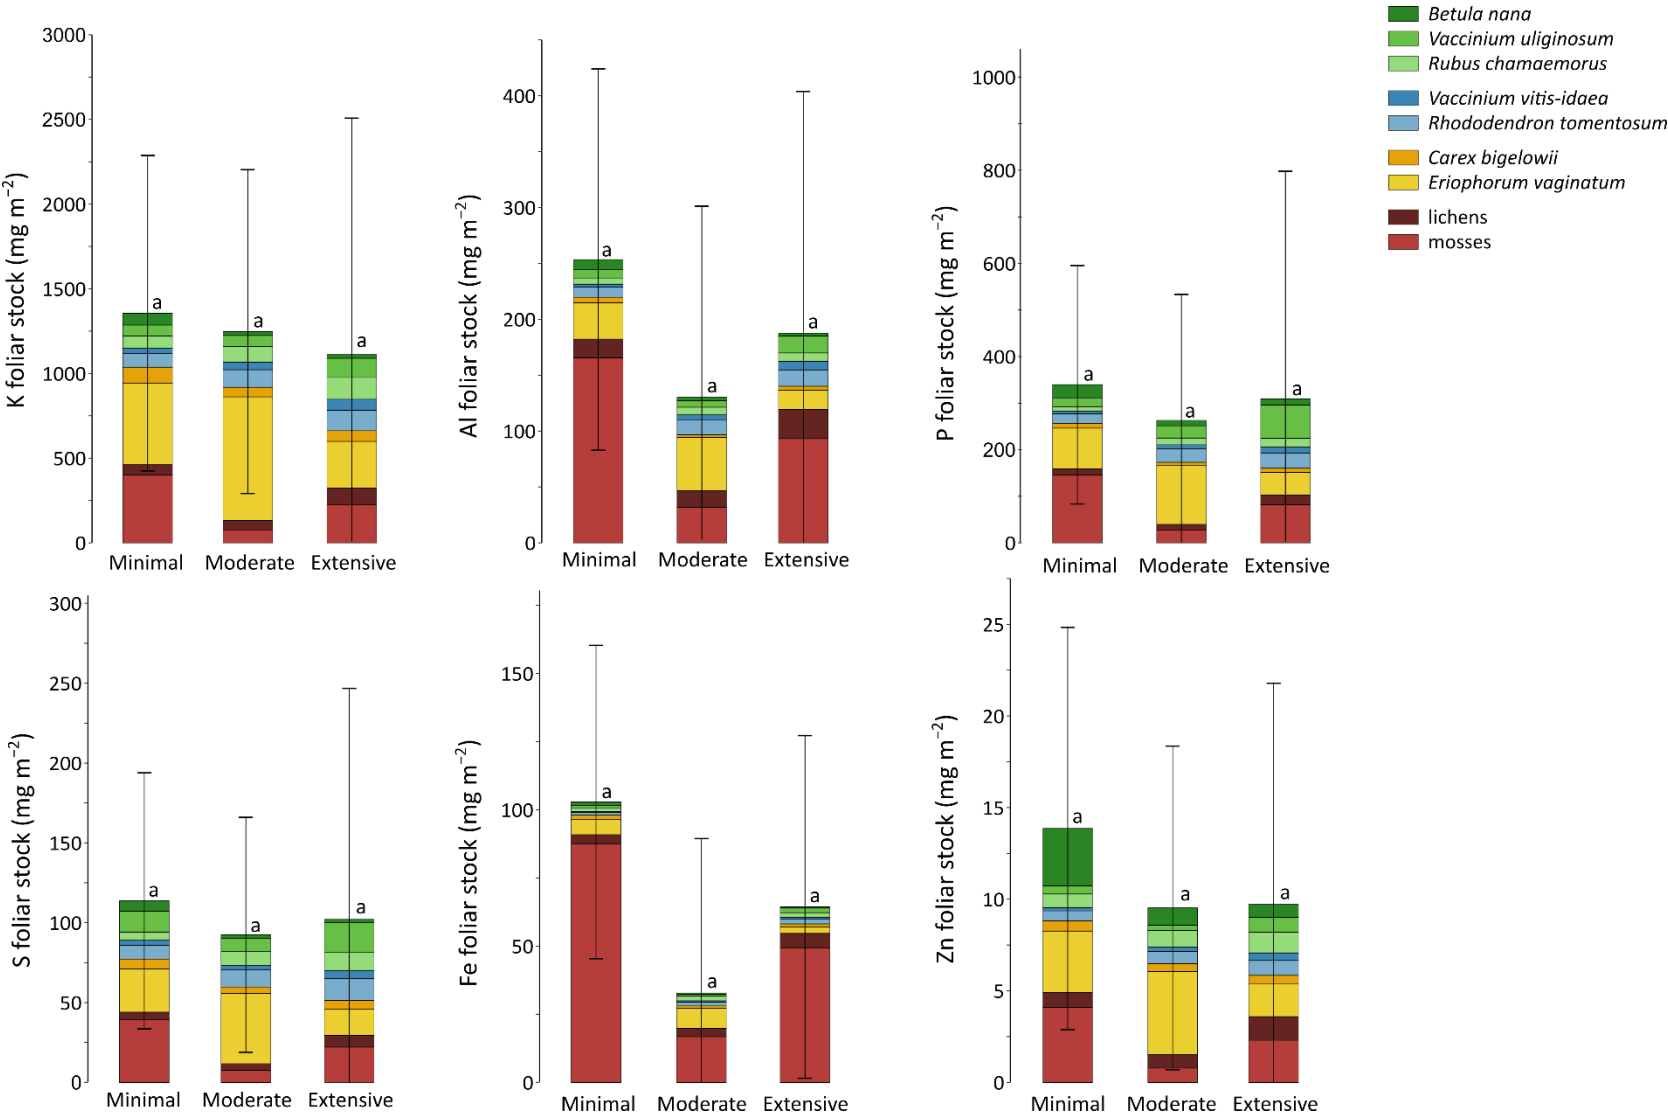

45

50

**Figure S.4. Cumulative annual foliar fluxes (mg m<sup>-2</sup> a<sup>-1</sup>) of mineral elements (K, Al, P, S, Fe, and Zn) from typical moist acidic tundra species. At the Carbon in Permafrost Experimental Heating Research (CiPEHR), the four treatments (Control, Summer warming, Winter warming and Annual warming) refer respectively to no artificial treatment, air warming, soil warming and both (air and soil) warming. Vegetation species are sorted by plant functional types: deciduous shrubs and forbs (green), and sedges (yellow). Letters correspond to a mixed model analysis and compare total foliar elemental fluxes between warming treatments and years. Error bars represent standard deviations.**

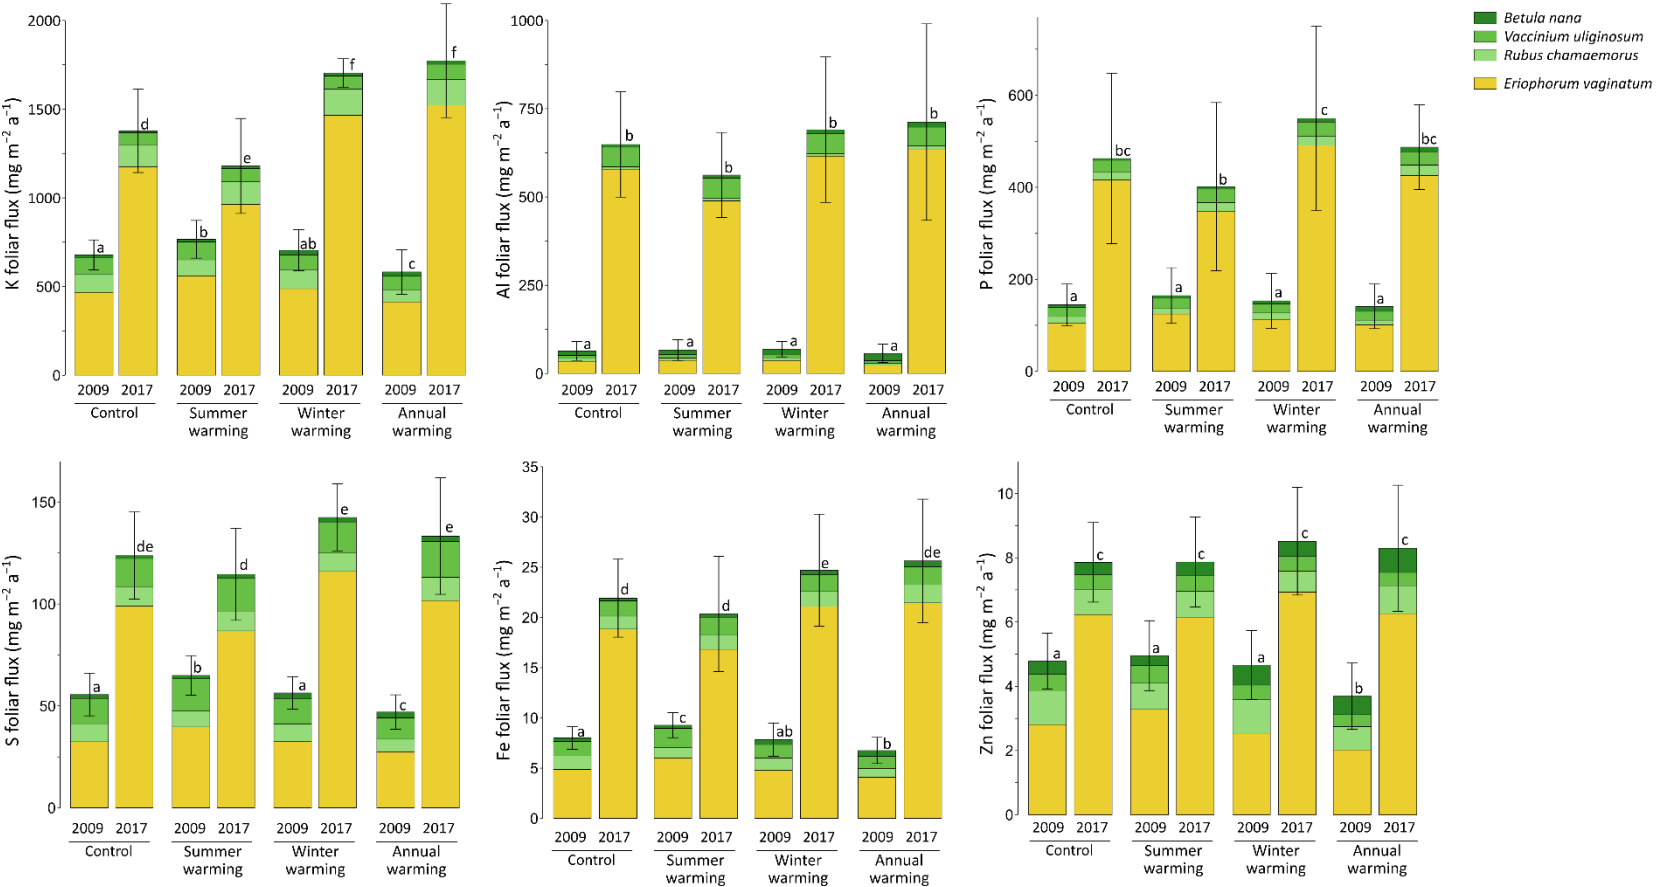

55

60

**Figure S.5. Cumulative annual foliar fluxes (mg m<sup>-2</sup> a<sup>-1</sup>) of mineral elements (K, Al, P, S, Fe, and Zn) from typical moist acidic tundra species. The natural thermokarst gradient (Gradient site) displays three stages of permafrost degradation, classified as Minimal, Moderate and Extensive, based on permafrost thaw and subsidence rate. Vegetation species are sorted by plant functional types: deciduous shrubs and forbs (green), and sedges (yellow). Letters correspond to one-way ANOVA test and compare total foliar elemental fluxes from the three stages of permafrost degradation at Gradient. Error bars represent standard deviations.**

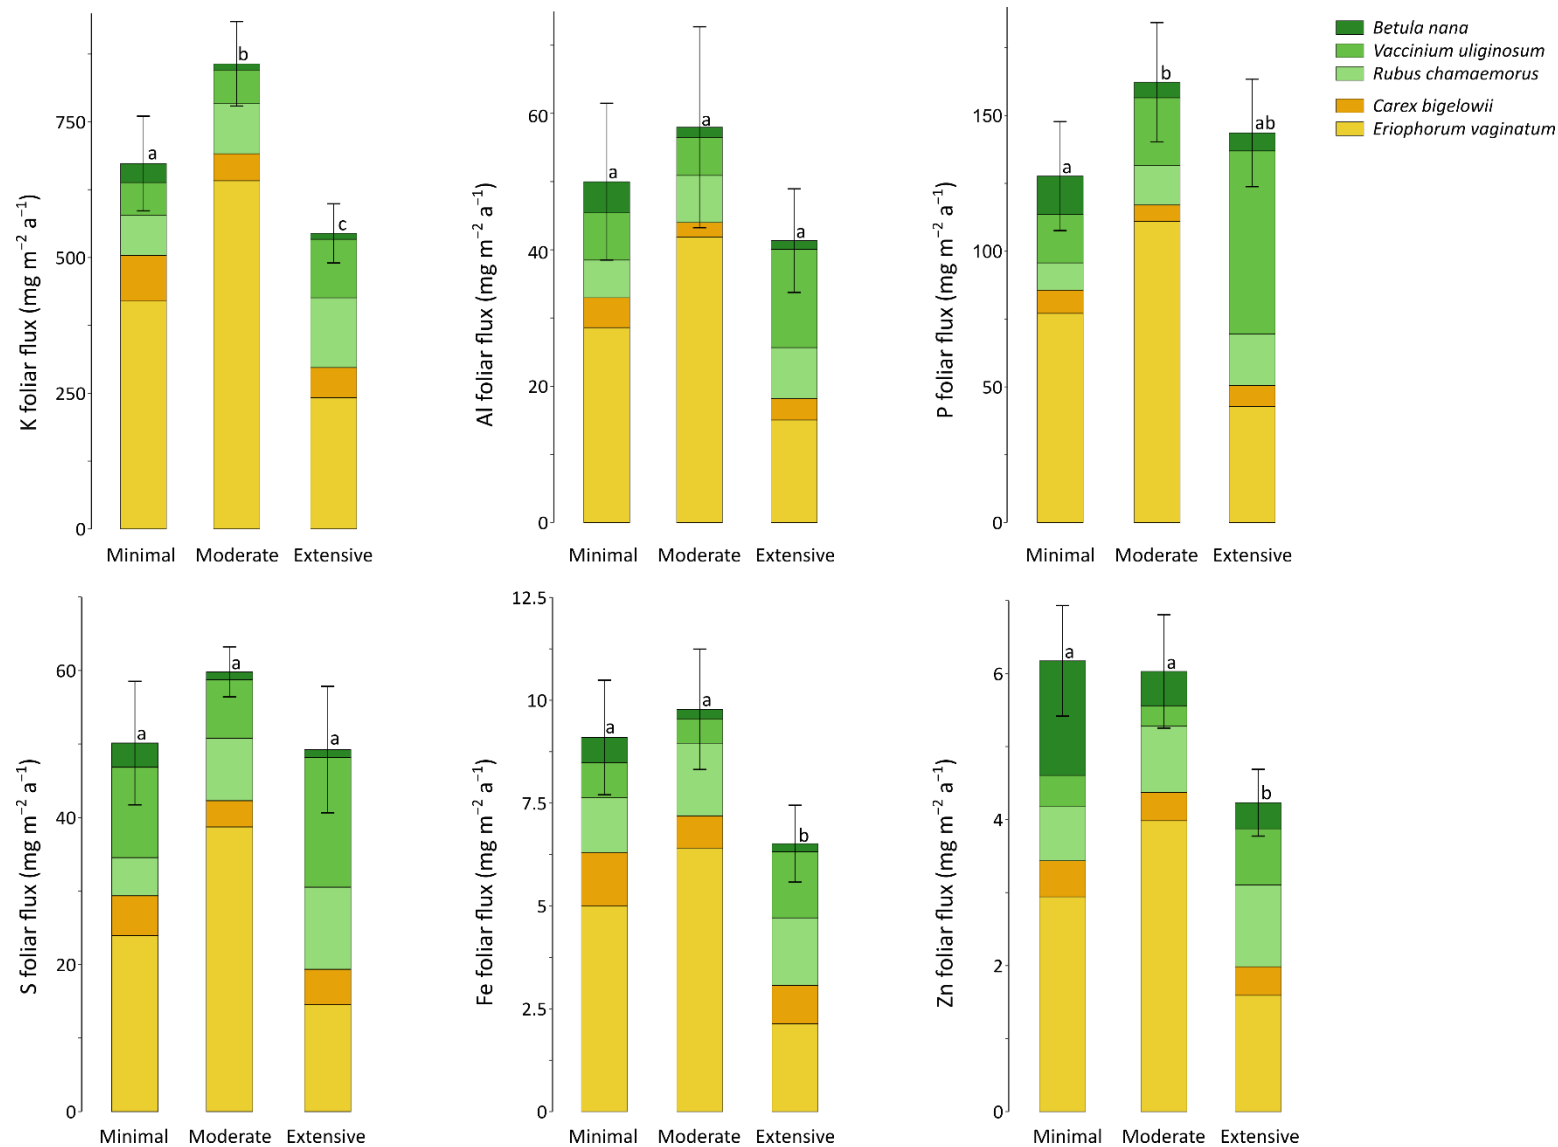

65 **Table S.1. Number of leaf samples used for the pXRF measurements of total elements concentration, at the Carbon in Permafrost Experimental Heating Research (CiPEHR) in 2009 and 2017, and at the natural thermokarst gradient (Gradient site) in 2019.**

| Site   | Year | Species               | Number of leaf samples |                |                |                |       |
|--------|------|-----------------------|------------------------|----------------|----------------|----------------|-------|
|        |      |                       | Control                | Summer warming | Winter warming | Annual warming | Total |
| CiPEHR | 2009 | <i>E.vaginatum</i>    | 12                     | 12             | 12             | 12             | 48    |
| CiPEHR | 2009 | <i>B. nana</i>        | 12                     | 10             | 11             | 8              | 41    |
| CiPEHR | 2009 | <i>V. uliginosum</i>  | 12                     | 12             | 12             | 12             | 48    |
| CiPEHR | 2009 | <i>R. chamaemorus</i> | 12                     | 12             | 12             | 12             | 48    |
| CiPEHR | 2009 | <i>V. vitis-idaea</i> | 12                     | 12             | 12             | 12             | 48    |
| CiPEHR | 2017 | <i>E.vaginatum</i>    | 12                     | 12             | 9              | 7              | 40    |
| CiPEHR | 2017 | <i>B. nana</i>        | 8                      | 9              | 7              | 8              | 32    |
| CiPEHR | 2017 | <i>V. uliginosum</i>  | 12                     | 12             | 11             | 11             | 46    |
| CiPEHR | 2017 | <i>R. chamaemorus</i> | 10                     | 11             | 12             | 10             | 43    |
| CiPEHR | 2017 | <i>V. vitis-idaea</i> | 12                     | 11             | 9              | 11             | 43    |

| Site     | Year | Species               | Number of leaf samples |            |            |       |
|----------|------|-----------------------|------------------------|------------|------------|-------|
|          |      |                       | Minimal                | Moderate   | Extensive  | Total |
| Gradient | 2019 | <i>E.vaginatum</i>    | 3                      | 3          | 3          | 9     |
| Gradient | 2019 | <i>C. bigelowii</i>   | 3                      | 3          | 3          | 9     |
| Gradient | 2019 | <i>B. nana</i>        | 3                      | 3          | 3          | 9     |
| Gradient | 2019 | <i>V. uliginosum</i>  | 3                      | 3          | 3          | 9     |
| Gradient | 2019 | <i>R. chamaemorus</i> | 3                      | 3          | 3          | 9     |
| Gradient | 2019 | <i>R. tomentosum</i>  | 3                      | 3          | 3          | 9     |
| Gradient | 2019 | <i>V. vitis-idaea</i> | 3                      | 3          | 3          | 9     |
| Gradient | 2019 | Moss                  | undefined*             | undefined* | undefined* | 3     |
| Gradient | 2019 | Lichen                | undefined*             | undefined* | undefined* | 3     |

\*Mosses and lichens were randomly sampled at Gradient and do not refer to a specific site. The total number of mosses and lichens corresponds to the three species sampled (for mosses: Sphagnum sp., Dicranum sp., and Brachytecium sp; for lichens: Nephroma sp., Cladonia sp., and Flavocetraria cucullata).

70 **Table S.2. Ratios between foliar biomass and aboveground biomass for seven typical vascular plant species from moist acidic tundra (Salmon et al., 2016; Schuur et al., 2007).**

| Species               | Plant functional type | Leave: aboveground ratio in biomass tissue allocation |
|-----------------------|-----------------------|-------------------------------------------------------|
| <i>E. vaginatum</i>   | Sedge                 | 0.63                                                  |
| <i>C. bigelowii</i>   | Sedge                 | 0.79                                                  |
| <i>B. nana</i>        | Dec. shrub            | 0.34                                                  |
| <i>V. uliginosum</i>  | Dec. shrub            | 0.28                                                  |
| <i>R. chamaemorus</i> | Forb                  | 0.91                                                  |
| <i>R. tomentosum</i>  | Evergr. shrub         | 0.39                                                  |
| <i>V. vitis-idaea</i> | Evergr. shrub         | 0.66                                                  |

**Table S.3. Vascular and non-vascular foliar biomasses (means ( $\mu$ ), standard deviations ( $\sigma$ ), and relative standard deviation (RDS)) from typical moist acidic tundra species, at Carbon in Permafrost Experimental Heating Research (CiPEHR) in 2009 and in 2017 (Taylor et al., 2018), and natural thermokarst gradient (Gradient site) in 2017 (Jasinski et al., 2018). The ratios between foliar and aboveground biomasses come from Salmon et al. (2016) and Schuur et al. (2007).**

| Site   | Year | Species               | Plant functional type | Foliar biomass (g m <sup>-2</sup> ) |                 |                      |                |                 |                      |                |                 |                      |                |                 |                      |
|--------|------|-----------------------|-----------------------|-------------------------------------|-----------------|----------------------|----------------|-----------------|----------------------|----------------|-----------------|----------------------|----------------|-----------------|----------------------|
|        |      |                       |                       | Control                             |                 |                      | Summer warming |                 |                      | Winter warming |                 |                      | Annual warming |                 |                      |
|        |      |                       |                       | Mean ( $\mu$ )                      | SD ( $\sigma$ ) | RSD ( $\sigma/\mu$ ) | Mean ( $\mu$ ) | SD ( $\sigma$ ) | RSD ( $\sigma/\mu$ ) | Mean ( $\mu$ ) | SD ( $\sigma$ ) | RSD ( $\sigma/\mu$ ) | Mean ( $\mu$ ) | SD ( $\sigma$ ) | RSD ( $\sigma/\mu$ ) |
| CiPEHR | 2009 | <i>E. vaginatum</i>   | Sedge                 | 61.83                               | 38.09           | 62%                  | 75.79          | 76.07           | 100%                 | 57.04          | 44.11           | 77%                  | 47.28          | 45.38           | 96%                  |
| CiPEHR | 2009 | <i>C. bigelowii</i>   | Sedge                 | 5.54                                | 4.39            | 79%                  | 8.43           | 6.48            | 77%                  | 9.30           | 6.56            | 71%                  | 9.93           | 5.81            | 59%                  |
| CiPEHR | 2009 | <i>Betula nana</i>    | Dec. shrub            | 4.51                                | 4.86            | 108%                 | 3.85           | 5.52            | 143%                 | 6.21           | 7.77            | 125%                 | 5.98           | 8.91            | 149%                 |
| CiPEHR | 2009 | <i>V. uliginosum</i>  | Dec. shrub            | 15.31                               | 4.14            | 27%                  | 18.32          | 8.87            | 48%                  | 14.28          | 5.78            | 41%                  | 11.66          | 4.88            | 42%                  |
| CiPEHR | 2009 | <i>R. chamaemorus</i> | Forb                  | 14.36                               | 5.96            | 42%                  | 12.54          | 4.87            | 39%                  | 13.55          | 2.66            | 20%                  | 10.13          | 6.60            | 65%                  |
| CiPEHR | 2009 | <i>R. tomentosum</i>  | Evergr. shrub         | 26.06                               | 13.96           | 54%                  | 26.65          | 13.07           | 49%                  | 31.78          | 14.02           | 44%                  | 27.59          | 9.82            | 36%                  |
| CiPEHR | 2009 | <i>V. vitis-idaea</i> | Evergr. shrub         | 16.62                               | 13.11           | 79%                  | 18.96          | 11.35           | 60%                  | 13.17          | 5.58            | 42%                  | 21.36          | 15.70           | 74%                  |
| CiPEHR | 2009 | Mosses                | Moss                  | 44.55                               | 16.63           | 37%                  | 45.86          | 19.93           | 43%                  | 41.03          | 13.37           | 33%                  | 47.24          | 20.73           | 44%                  |
| CiPEHR | 2009 | Lichens               | Lichen                | 39.81                               | 30.93           | 78%                  | 33.08          | 24.97           | 75%                  | 42.06          | 23.80           | 57%                  | 34.84          | 38.00           | 109%                 |
| CiPEHR | 2009 | <b>Total</b>          |                       | <b>228.61</b>                       |                 |                      | <b>243.48</b>  |                 |                      | <b>228.42</b>  |                 |                      | <b>216.02</b>  |                 |                      |

| Site   | Year | Species               | Plant functional type | Foliar biomass (g m <sup>-2</sup> ) |                 |                      |                |                 |                      |                |                 |                      |                |                 |                      |
|--------|------|-----------------------|-----------------------|-------------------------------------|-----------------|----------------------|----------------|-----------------|----------------------|----------------|-----------------|----------------------|----------------|-----------------|----------------------|
|        |      |                       |                       | Control                             |                 |                      | Summer warming |                 |                      | Winter warming |                 |                      | Annual warming |                 |                      |
|        |      |                       |                       | Mean ( $\mu$ )                      | SD ( $\sigma$ ) | RSD ( $\sigma/\mu$ ) | Mean ( $\mu$ ) | SD ( $\sigma$ ) | RSD ( $\sigma/\mu$ ) | Mean ( $\mu$ ) | SD ( $\sigma$ ) | RSD ( $\sigma/\mu$ ) | Mean ( $\mu$ ) | SD ( $\sigma$ ) | RSD ( $\sigma/\mu$ ) |
| CiPEHR | 2017 | <i>E. vaginatum</i>   | Sedge                 | 149.14                              | 84.64           | 57%                  | 130.52         | 110.26          | 84%                  | 161.35         | 98.55           | 61%                  | 161.48         | 123.87          | 77%                  |
| CiPEHR | 2017 | <i>C. bigelowii</i>   | Sedge                 | 2.40                                | 1.64            | 68%                  | 2.84           | 3.15            | 111%                 | 8.87           | 11.52           | 130%                 | 4.06           | 1.69            | 42%                  |
| CiPEHR | 2017 | <i>Betula nana</i>    | Dec. shrub            | 3.46                                | 4.29            | 124%                 | 4.02           | 6.26            | 156%                 | 4.80           | 5.61            | 117%                 | 6.03           | 8.78            | 146%                 |
| CiPEHR | 2017 | <i>V. uliginosum</i>  | Dec. shrub            | 13.39                               | 4.31            | 32%                  | 14.61          | 4.70            | 32%                  | 14.11          | 6.83            | 48%                  | 13.88          | 9.97            | 72%                  |
| CiPEHR | 2017 | <i>R. chamaemorus</i> | Forb                  | 15.16                               | 9.93            | 65%                  | 16.44          | 6.99            | 43%                  | 14.65          | 8.25            | 56%                  | 19.11          | 8.63            | 45%                  |
| CiPEHR | 2017 | <i>R. tomentosum</i>  | Evergr. shrub         | 33.68                               | 17.12           | 51%                  | 31.97          | 14.84           | 46%                  | 35.94          | 17.21           | 48%                  | 33.53          | 17.91           | 53%                  |
| CiPEHR | 2017 | <i>V. vitis-idaea</i> | Evergr. shrub         | 11.26                               | 3.87            | 34%                  | 12.79          | 9.45            | 74%                  | 3.97           | 5.26            | 132%                 | 8.13           | 3.72            | 46%                  |
| CiPEHR | 2017 | Mosses                | Moss                  | 29.52                               | 20.61           | 70%                  | 23.29          | 25.60           | 110%                 | 15.98          | 16.67           | 104%                 | 32.41          | 50.78           | 157%                 |
| CiPEHR | 2017 | Lichens               | Lichen                | 36.56                               | 40.40           | 111%                 | 21.32          | 30.27           | 142%                 | 7.60           | 10.74           | 141%                 | 12.20          | 28.60           | 235%                 |
| CiPEHR | 2017 | <b>Total</b>          |                       | <b>294.57</b>                       |                 |                      | <b>257.81</b>  |                 |                      | <b>267.28</b>  |                 |                      | <b>290.81</b>  |                 |                      |



| Site     | Year | Species               | Plant functional type | Foliar biomass (g m <sup>-2</sup> ) |        |           |               |        |           |               |        |           |
|----------|------|-----------------------|-----------------------|-------------------------------------|--------|-----------|---------------|--------|-----------|---------------|--------|-----------|
|          |      |                       |                       | Minimal                             |        |           | Moderate      |        |           | Extensive     |        |           |
|          |      |                       |                       | Mean (μ)                            | SD (σ) | RSD (σ/μ) | Mean (μ)      | SD (σ) | RSD (σ/μ) | Mean (μ)      | SD (σ) | RSD (σ/μ) |
| Gradient | 2017 | <i>E. vaginatum</i>   | Sedge                 | 61.69                               | 30.16  | 49%       | 89.23         | 33.32  | 37%       | 33.74         | 52.34  | 155%      |
| Gradient | 2017 | <i>C. bigelowii</i>   | Sedge                 | 8.24                                | 3.09   | 37%       | 5.16          | 2.67   | 52%       | 5.95          | 3.12   | 52%       |
| Gradient | 2017 | <i>Betula nana</i>    | Dec. shrub            | 14.77                               | 15.01  | 102%      | 5.04          | 5.89   | 117%      | 4.25          | 5.06   | 119%      |
| Gradient | 2017 | <i>V. uliginosum</i>  | Dec. shrub            | 14.13                               | 3.34   | 24%       | 11.07         | 4.69   | 42%       | 24.47         | 20.80  | 85%       |
| Gradient | 2017 | <i>R. chamaemorus</i> | Forb                  | 14.25                               | 4.60   | 32%       | 19.51         | 3.26   | 17%       | 24.60         | 14.64  | 60%       |
| Gradient | 2017 | <i>R. tomentosum</i>  | Evergr. shrub         | 28.24                               | 12.56  | 44%       | 35.42         | 14.22  | 40%       | 43.34         | 15.45  | 36%       |
| Gradient | 2017 | <i>V. vitis-idaea</i> | Evergr. shrub         | 6.18                                | 5.53   | 89%       | 8.51          | 5.14   | 60%       | 13.98         | 10.91  | 78%       |
| Gradient | 2017 | Mosses                | Moss                  | 108.77                              | 125.10 | 115%      | 20.89         | 19.54  | 94%       | 61.30         | 48.71  | 79%       |
| Gradient | 2017 | Lichens               | Lichen                | 20.96                               | 16.91  | 81%       | 18.65         | 21.08  | 113%      | 32.67         | 38.63  | 118%      |
| Gradient | 2017 | <b>Total</b>          |                       | <b>277.23</b>                       |        |           | <b>213.49</b> |        |           | <b>244.29</b> |        |           |

**Table S.4. Foliar net primary productivity (NPP) adapted from Schuur et al. (2007), at Carbon in Permafrost Experimental Heating Research (CiPEHR) in 2009 and in 2017, and at the natural thermokarst gradient (Gradient site) in 2017.**Figure 1: The logo of Copernicus Publications.

| Site   | Species               | Plant functional type | 2009 Foliar NPP (g m <sup>-2</sup> a <sup>-1</sup> ) |                |                |                | 2017 Foliar NPP (g m <sup>-2</sup> a <sup>-1</sup> ) |                |                |                |
|--------|-----------------------|-----------------------|------------------------------------------------------|----------------|----------------|----------------|------------------------------------------------------|----------------|----------------|----------------|
|        |                       |                       | Control                                              | Summer warming | Winter warming | Annual warming | Control                                              | Summer warming | Winter warming | Annual warming |
| CiPEHR | <i>E. vaginatum</i>   | Sedge                 | 57.74                                                | 70.77          | 53.27          | 44.15          | 139.26                                               | 121.88         | 150.67         | 150.79         |
| CiPEHR | <i>C. bigelowii</i>   | Sedge                 | 6.63                                                 | 10.08          | 11.12          | 11.87          | 2.87                                                 | 3.40           | 10.61          | 4.85           |
| CiPEHR | <i>Betula nana</i>    | Dec. shrub            | 2.87                                                 | 2.45           | 3.95           | 3.81           | 2.20                                                 | 2.56           | 3.05           | 3.83           |
| CiPEHR | <i>V. uliginosum</i>  | Dec. shrub            | 15.98                                                | 19.11          | 14.90          | 12.17          | 13.97                                                | 15.25          | 14.72          | 14.48          |
| CiPEHR | <i>R. chamaemorus</i> | Forb                  | 12.08                                                | 10.54          | 11.40          | 8.52           | 12.75                                                | 13.82          | 12.32          | 16.07          |

| Site     | Species               | Plant functional type | 2017 Foliar NPP (g m <sup>-2</sup> a <sup>-1</sup> ) |               |                |
|----------|-----------------------|-----------------------|------------------------------------------------------|---------------|----------------|
|          |                       |                       | Minimal Thaw                                         | Moderate Thaw | Extensive Thaw |
| Gradient | <i>E. vaginatum</i>   | Sedge                 | 57.61                                                | 83.32         | 31.50          |
| Gradient | <i>C. bigelowii</i>   | Sedge                 | 9.86                                                 | 6.17          | 7.12           |
| Gradient | <i>Betula nana</i>    | Dec. shrub            | 9.39                                                 | 3.20          | 2.70           |
| Gradient | <i>V. uliginosum</i>  | Dec. shrub            | 14.74                                                | 11.55         | 25.53          |
| Gradient | <i>R. chamaemorus</i> | Forb                  | 11.99                                                | 16.41         | 20.69          |

**Table S.5. Results of mixed model (*Lmer4* package in R 4.0.2 (R Core Team, 2020)) on foliar mineral element stocks and maximum potential litterfall fluxes at CiPEHR. We included individual plots as random factors, and year (2009 and 2017) and treatments (control, summer warming, winter warming, and annual warming) as covariates. The model includes interactions between treatments (summer × winter), and between treatments and years (2009 and 2017).**

| Mineral element        | Foliar stocks at CiPEHR |         |          |         |          |         |
|------------------------|-------------------------|---------|----------|---------|----------|---------|
|                        | Al §                    |         | Ca       |         | Fe §     |         |
|                        | Estimate                | p-value | Estimate | p-value | Estimate | p-value |
| Intercept (Control)    | 4.95                    | ***     | 395.23   | ***     | 2.35     | ***     |
| Winter                 | 0.03                    |         | -50.75   |         | -0.12    |         |
| Summer                 | 0.13                    |         | -10.49   |         | -0.05    |         |
| Year2017               | 1.50                    | ***     | 61.55    |         | 0.75     | ***     |
| Winter*Summer          | -0.19                   |         | -64.52   |         | -0.13    |         |
| Winter:Year2017        | 0.54                    |         | 0.95     |         | 0.39     |         |
| Summer*Year2017        | -0.44                   |         | -14.48   |         | -0.26    |         |
| Winter*Summer*Year2017 | 0.24                    |         | 264.21   | *       | 0.45     |         |
|                        |                         |         |          |         |          |         |
| Mineral element        | K                       |         | Mn §     |         | P §      |         |
|                        | Estimate                | p-value | Estimate | p-value | Estimate | p-value |
|                        |                         |         |          |         |          |         |
| Intercept (Control)    | 852.17                  | ***     | 4.86     | ***     | 5.10     | ***     |
| Winter                 | -40.36                  |         | -0.15    |         | -0.06    |         |
| Summer                 | -28.33                  |         | 0.07     |         | -0.27    |         |
| Year2017               | 743.76                  | **      | 0.11     |         | 0.96     | ***     |
| Winter*Summer          | -114.18                 |         | -0.23    |         | 0.09     |         |
| Winter:Year2017        | 582.14                  |         | 0.19     |         | 0.49     |         |
| Summer*Year2017        | -329.54                 |         | -0.04    |         | -0.19    |         |
| Winter*Summer*Year2017 | 548.39                  |         | 0.43     |         | 0.12     |         |
|                        |                         |         |          |         |          |         |
| Mineral element        | S                       |         | Si §     |         | Zn       |         |
|                        | Estimate                | p-value | Estimate | p-value | Estimate | p-value |
|                        |                         |         |          |         |          |         |
| Intercept (Control)    | 68.92                   | ***     | 6.22     | ***     | 6.17     | ***     |
| Winter                 | -1.34                   |         | 0.06     |         | -0.69    |         |
| Summer                 | 3.12                    |         | 0.08     |         | -0.84    |         |
| Year2017               | 66.65                   | ***     | 1.25     | ***     | 3.17     | **      |
| Winter*Summer          | -15.30                  |         | -0.03    |         | -0.56    |         |
| Winter:Year2017        | 23.24                   |         | 0.43     |         | -0.32    |         |
| Summer*Year2017        | -16.11                  |         | -0.39    |         | -0.33    |         |
| Winter*Summer*Year2017 | 67.23                   |         | 0.27     |         | 4.65     |         |
|                        |                         |         |          |         |          |         |
| Mineral element        | Al §                    |         | Ca       |         | Fe §     |         |
|                        | Estimate                | p-value | Estimate | p-value | Estimate | p-value |
|                        |                         |         |          |         |          |         |
| Intercept (Control)    | 4.12                    | ***     | 276.00   | ***     | 2.08     | ***     |
| Winter                 | 0.07                    |         | -21.16   |         | -0.03    |         |
| Summer                 | 0.05                    |         | 10.53    |         | 0.16     | *       |
| Year2017               | 2.33                    | ***     | 104.25   | ***     | 0.99     | ***     |
| Winter*Summer          | -0.19                   |         | -65.17   | **      | -0.29    | **      |
| Winter:Year2017        | 0.09                    |         | 20.28    |         | 0.25     | *       |
| Summer*Year2017        | -0.17                   |         | 5.52     |         | -0.22    | *       |
| Winter*Summer*Year2017 | 0.09                    |         | 83.74    | *       | 0.23     |         |
|                        |                         |         |          |         |          |         |
| Mineral element        | K                       |         | Mn       |         | P §      |         |
|                        | Estimate                | p-value | Estimate | p-value | Estimate | p-value |
|                        |                         |         |          |         |          |         |
| Intercept (Control)    | 678.20                  | ***     | 70.07    | ***     | 4.96     | ***     |
| Winter                 | 25.45                   |         | 0.23     |         | 0.06     |         |
| Summer                 | 88.87                   | *       | 14.43    | **      | 0.12     |         |
| Year2017               | 623.55                  | ***     | 38.54    | ***     | 1.12     | ***     |
| Winter*Summer          | -205.60                 | ***     | -24.04   | **      | -0.18    |         |
| Winter:Year2017        | 299.80                  | *       | 14.12    |         | 0.14     |         |
| Summer*Year2017        | -284.88                 | **      | -9.90    |         | -0.26    |         |
| Winter*Summer*Year2017 | 480.90                  | **      | 17.60    |         | 0.16     |         |
|                        |                         |         |          |         |          |         |
| Mineral element        | S §                     |         | Si §     |         | Zn       |         |
|                        | Estimate                | p-value | Estimate | p-value | Estimate | p-value |
|                        |                         |         |          |         |          |         |
| Intercept (Control)    | 4.01                    | ***     | 5.73     | ***     | 4.78     | ***     |
| Winter                 | 0.02                    |         | 0.13     |         | -0.15    |         |
| Summer                 | 0.17                    | **      | 0.15     |         | 0.24     |         |
| Year2017               | 0.77                    | ***     | 1.77     | ***     | 2.81     | ***     |
| Winter*Summer          | -0.35                   | ***     | -0.11    |         | -1.39    | *       |
| Winter:Year2017        | 0.12                    |         | 0.05     |         | 0.79     |         |
| Summer*Year2017        | -0.20                   | *       | -0.22    |         | 0.22     |         |
| Winter*Summer*Year2017 | 0.40                    | *       | 0.13     |         | 1.40     |         |

Notes: The p-value asterisks indicate level of significance: p < 0.05 (\*), p < 0.01(\*\*), p < 0.001 (\*\*\*), and not significant (blank). Some mineral element foliar stocks were log-transformed (§) to achieve homogeneity of variance.
